# Supplementary material for: First-principles study of the surface reactions of aminosilane precursors over WO3(001) during atomic layer deposition of SiO2
Source: Royal Society of Chemistry journal article supplement (doi:10.1039/d0ra01635g), 2020-01-01
Supplement: d0ra01635g1.pdf [file d0ra01635g1.pdf]

## First-principles study of the surface reactions of aminosilane precursors over WO<sub>3</sub>(001) during atomic layer deposition of SiO<sub>2</sub>

Kyungtae Lee<sup>a</sup>, Youngseon Shim<sup>a\*</sup>

<sup>a</sup>CSE Team, Data & Information Technology (DIT) Center, Samsung Electronics Co. Ltd., 130 Samsung-ro, Suwon, Gyeonggi-do, 16678, South Korea. E-mail: ys1231.shim@samsung.com

Table S1. Volumes of precursor molecules and the corresponding amino ligand, which were measured at the medium level of grid resolution using the Connolly surface task in Materials Studio software.

|       | molecular volume (Å <sup>3</sup> ) | amino ligand volume (Å <sup>3</sup> ) |
|-------|------------------------------------|---------------------------------------|
| DIPAS | 169.34                             | 130.88                                |
| BDEAS | 215.30                             | 92.80                                 |
| TDMAS | 191.04                             | 56.26                                 |

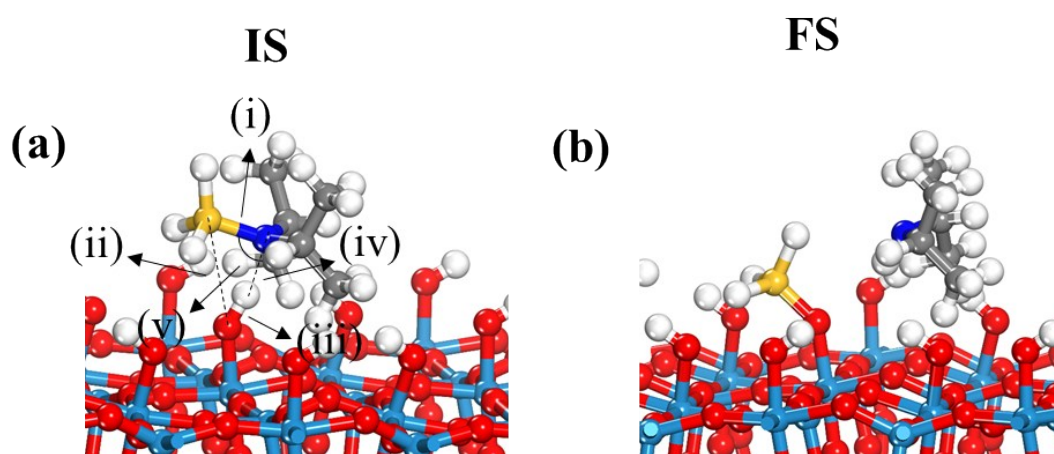

Fig. S1. Initial (IS) and final (FS) states of the first dissociative chemisorption, of DIPAS using the force convergence criterion of 0.03 eV Å<sup>-1</sup>. Red spheres, O; light blue spheres, W; blue spheres, N; yellow spheres, Si; gray spheres, C; white spheres, H. (i) Si-N distance (1.772, a; 4.077, b), (ii) Si-O distance (3.098, a; 1.648, b), (iii) O-H distance (1.026, a; 2.681, b), (iv) N-H distance (1.663, a; 1.023, b), and (v) H-N-Si angle (89.5°, a). The unit of distance is Å.

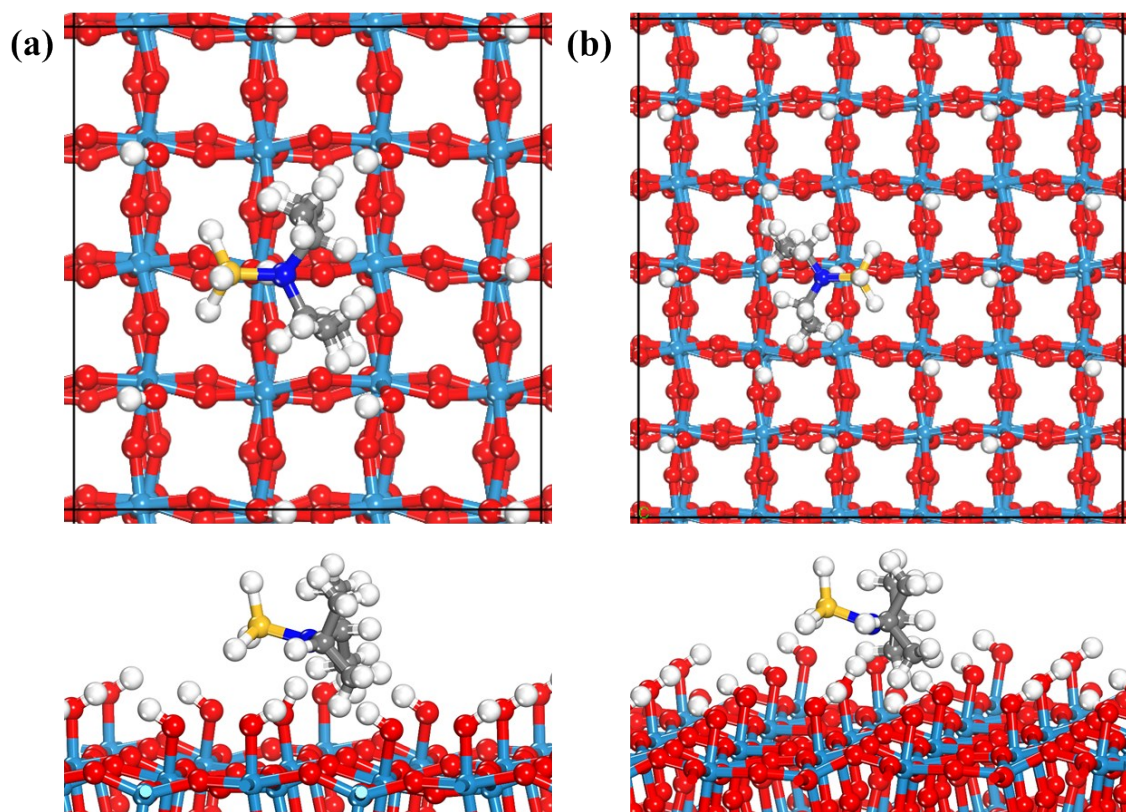

Fig. S2. Adsorption of DIPAS on the (a)  $4 \times 4$  and (b)  $6 \times 6$  cell units of WO<sub>3</sub> (001) surface, respectively, where the black line indicates the cell boundaries of surface slabs. Red spheres, O; light blue spheres, W; blue spheres, N; yellow spheres, Si; gray spheres, C; white spheres, H.

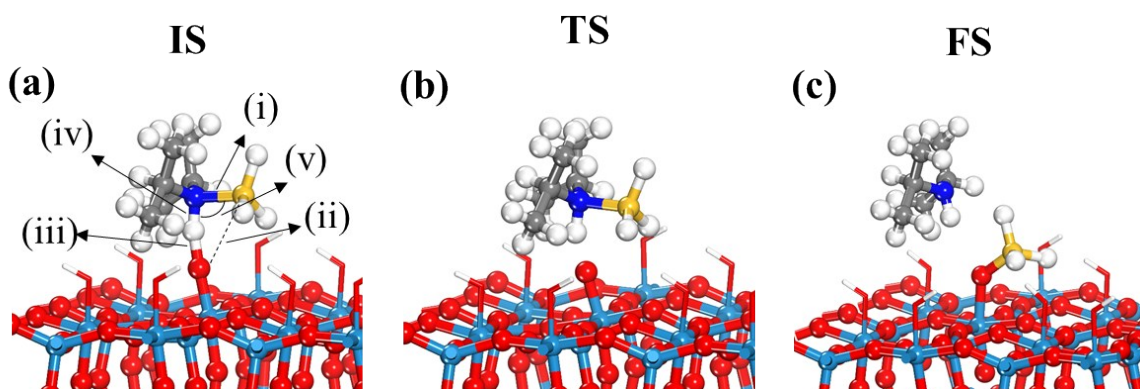

Fig. S3. Initial (IS), transition (TS), final (FS) states of the first dissociation step, dissociative chemisorption, of DIPAS, which was reported in ref 26. Terminal hydroxyl groups on the  $\text{WO}_3$  surface are displayed in stick style if there is no direct interaction with adsorbates, in which red and white colors indicate O and H atoms, respectively. The decomposition reaction of DIPAS is redrawn with permission from ref 26. Red spheres, O; light blue spheres, W; blue spheres, N; yellow spheres, Si; gray spheres, C; white spheres, H. (i) Si-N distance (1.826, a; 1.847, b; 3.627, c), (ii) Si-O distance (3.099, a; 2.854, b; 1.653, c), (iii) O-H distance (1.342, a; 1.455, b; 2.579, c), (iv) N-H distance (1.181, a; 1.122, b; 1.021, c), and (v) H-N-Si angle ( $95.8^\circ$ , a). The unit of distance is  $\text{\AA}$ .

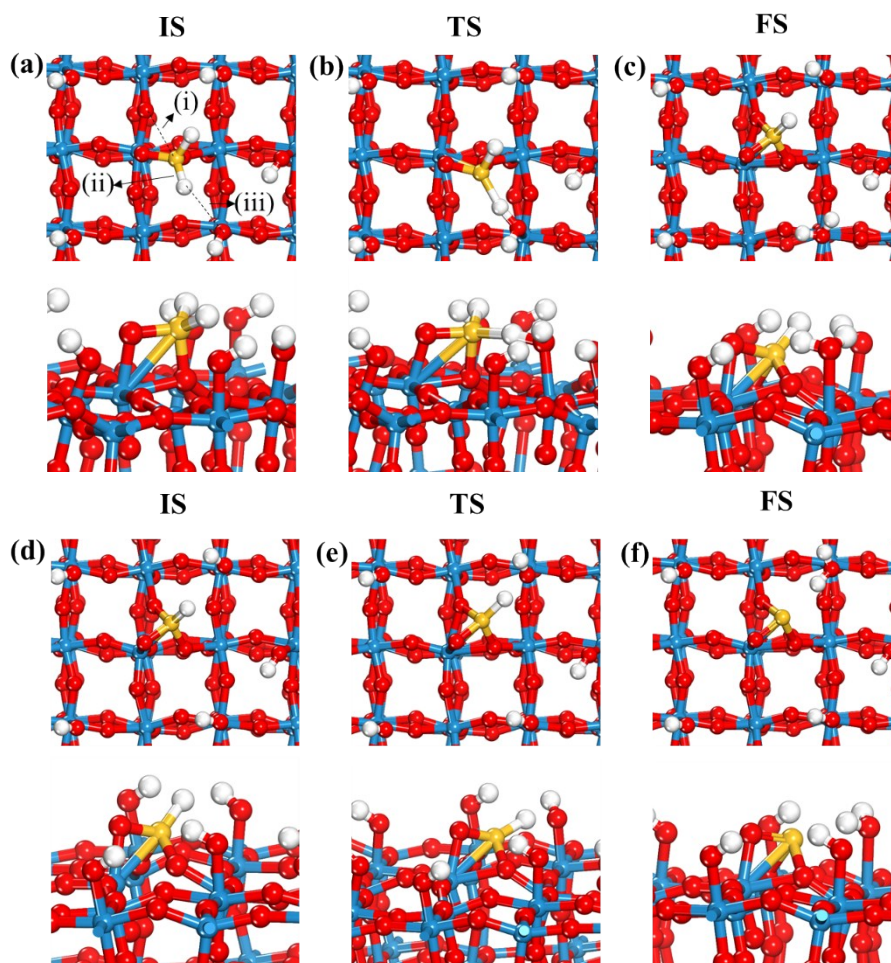

Fig. S4. Top and side views of initial (IS), transition (TS), and final (FS) states of (a-c)  $\text{SiH}_2$  and (d-f)  $\text{SiH}$  dissociation. These reactions are redrawn with permission from ref 26. Red spheres, O; light blue spheres, W; blue spheres, N; yellow spheres, Si; gray spheres, C; white spheres, H. (i) Si-O distance (3.371, a; 3.596, b; 1.676, c), (ii) Si-H distance (1.483, a; 1.831, b; 5.052, c; 1.466, d; 1.618, e; 2.426, f), and (iii) H-O distance (2.933, a; 1.279, b; 0.975, c; 2.529, d; 1.591, e; 1.006, f). The unit of distance is  $\text{\AA}$ .

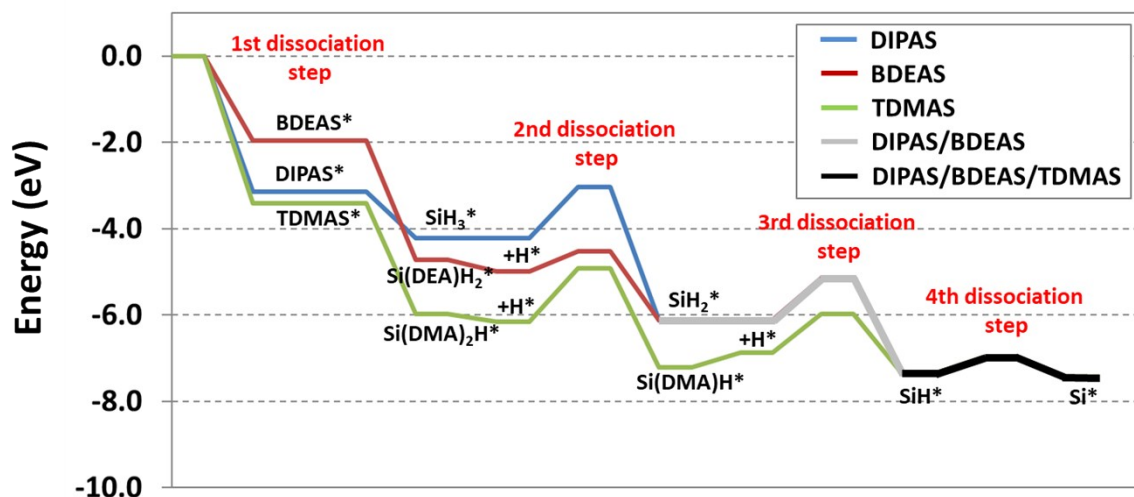

Fig. S5. Energy diagram of redrawn reaction pathways of Fig. 5 by adjusting the energy levels of  $\text{Si}^*$ .

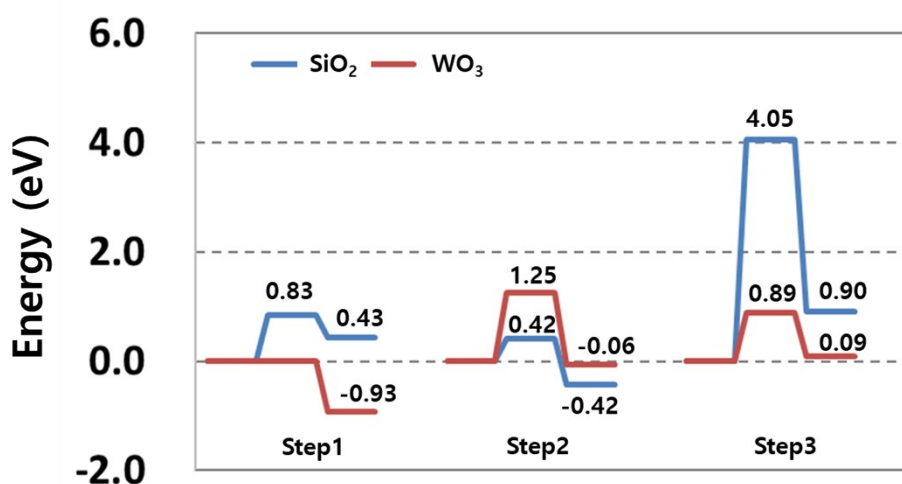

Fig. S6. Comparison of the reaction energetics of three sequential Si-N dissociation steps of TDMAS between on the hydroxyl-terminated  $\text{WO}_3$  (001) surface and on the hydroxyl-terminated  $\text{SiO}_2$  (001) surface. The reaction barriers and reaction energies are expressed on the energy diagrams in eV. The  $\text{SiO}_2$  results are based on ref 24.

Supplementary Note: Coordinates of the crystal structure, surface slab, and precursor molecules

(1) The bulk structure of  $\text{WO}_3$

lattice constant

|                     |                    |                    |
|---------------------|--------------------|--------------------|
| 7.3000001906999996  | 0.0000000000000000 | 0.0000000000000000 |
| 0.0000000000000000  | 7.5300002097999998 | 0.0000000000000000 |
| -0.1206323988000000 | 0.0000000000000000 | 7.6790523626000002 |

fractional coordinates

|   |              |              |             |
|---|--------------|--------------|-------------|
| O | 0.293063909  | 0.039349102  | 0.007531346 |
| O | 0.706582443  | 0.516557281  | 0.006202568 |
| O | -0.000878972 | 0.043711820  | 0.208394873 |
| O | -0.000330407 | 0.455971636  | 0.210437265 |
| O | 0.701004754  | 0.240381228  | 0.232793485 |
| O | 0.210031489  | 0.760018097  | 0.213498455 |
| O | 0.289968496  | 0.260018068  | 0.286501530 |
| O | 0.798995246  | 0.740381214  | 0.267206500 |
| O | 0.500878972  | 0.543711796  | 0.291605127 |
| O | 0.500330407  | 0.955971666  | 0.289562735 |
| O | 0.793417557  | 0.016557291  | 0.493797430 |
| O | 0.206936091  | 0.539349124  | 0.492468652 |
| O | 0.793063879  | 0.460650905  | 0.507531318 |
| O | 0.206582413  | -0.016557281 | 0.506202540 |
| O | 0.499669593  | 0.044028358  | 0.710437295 |
| O | 0.499121028  | 0.456288174  | 0.708394903 |
| O | 0.201004768  | 0.259618757  | 0.732793500 |
| O | 0.710031475  | 0.739981903  | 0.713498470 |
| O | 0.789968525  | 0.239981917  | 0.786501530 |
| O | 0.298995217  | 0.759618786  | 0.767206500 |
| O | 0.000330407  | 0.544028334  | 0.789562705 |
| O | 0.000878972  | 0.956288204  | 0.791605097 |
| O | 0.293417587  | 0.483442719  | 0.993797460 |
| O | 0.706936121  | 0.960650876  | 0.992468682 |
| W | 0.248972750  | 0.523359782  | 0.217836115 |
| W | 0.751701312  | 0.971607136  | 0.220673525 |
| W | 0.748298688  | 0.471607136  | 0.279326460 |
| W | 0.251027250  | 0.023359760  | 0.282163885 |
| W | 0.748972780  | 0.976640218  | 0.717836085 |
| W | 0.251701282  | 0.528392864  | 0.720673510 |
| W | 0.248298703  | 0.028392872  | 0.779326490 |
| W | 0.751027220  | 0.476640248  | 0.782163915 |

(2) The hydroxylated-terminated  $\text{WO}_3$  (001) surface slab

lattice constant

|                     |                     |                     |
|---------------------|---------------------|---------------------|
| 14.6000003800000009 | 0.0000000000000000  | 0.0000000000000000  |
| 0.0000000000000000  | 15.0600004199999997 | 0.0000000000000000  |
| -0.5497570404222200 | 0.0000000000000000  | 34.9956821221776835 |

fractional coordinates

|   |             |             |             |
|---|-------------|-------------|-------------|
| O | 0.140538000 | 0.020000000 | 0.020870300 |
| O | 0.640538000 | 0.020000000 | 0.020870300 |
| O | 0.860538000 | 0.255000000 | 0.020870300 |
| O | 0.360538000 | 0.255000000 | 0.020870300 |

|   |             |             |             |
|---|-------------|-------------|-------------|
| O | 0.640538000 | 0.520000000 | 0.020870300 |
| O | 0.140538000 | 0.520000000 | 0.020870300 |
| O | 0.360538000 | 0.755000000 | 0.020870300 |
| O | 0.860538000 | 0.755000000 | 0.020870300 |
| O | 0.500538000 | 0.012500000 | 0.062561800 |
| O | 0.000538000 | 0.012500000 | 0.062561800 |
| O | 0.000538000 | 0.237500000 | 0.062561800 |
| O | 0.500538000 | 0.237500000 | 0.062561800 |
| O | 0.000538000 | 0.512500000 | 0.062561800 |
| O | 0.500538000 | 0.512500000 | 0.062561800 |
| O | 0.000538000 | 0.737500000 | 0.062561800 |
| O | 0.500538000 | 0.737500000 | 0.062561800 |
| O | 0.355538000 | 0.105000000 | 0.065853200 |
| O | 0.855538000 | 0.105000000 | 0.065853200 |
| O | 0.105538000 | 0.395000000 | 0.065853200 |
| O | 0.605538000 | 0.395000000 | 0.065853200 |
| O | 0.355538000 | 0.605000000 | 0.065853200 |
| O | 0.855538000 | 0.605000000 | 0.065853200 |
| O | 0.105538000 | 0.895000000 | 0.065853200 |
| O | 0.605538000 | 0.895000000 | 0.065853200 |
| O | 0.145538000 | 0.145000000 | 0.072436000 |
| O | 0.645538000 | 0.145000000 | 0.072436000 |
| O | 0.395538000 | 0.355000000 | 0.072436000 |
| O | 0.895538000 | 0.355000000 | 0.072436000 |
| O | 0.145538000 | 0.645000000 | 0.072436000 |
| O | 0.645538000 | 0.645000000 | 0.072436000 |
| O | 0.395538000 | 0.855000000 | 0.072436000 |
| O | 0.895538000 | 0.855000000 | 0.072436000 |
| O | 0.750538000 | 0.262500000 | 0.075727500 |
| O | 0.250538000 | 0.262500000 | 0.075727500 |
| O | 0.750538000 | 0.487500000 | 0.075727500 |
| O | 0.250538000 | 0.487500000 | 0.075727500 |
| O | 0.250538000 | 0.762500000 | 0.075727500 |
| O | 0.750538000 | 0.762500000 | 0.075727500 |
| O | 0.250538000 | 0.987500000 | 0.075727500 |
| O | 0.750538000 | 0.987500000 | 0.075727500 |
| O | 0.390538000 | 0.005000000 | 0.117418900 |
| O | 0.890538000 | 0.005000000 | 0.117418900 |
| O | 0.610538000 | 0.270000000 | 0.117418900 |
| O | 0.110538000 | 0.270000000 | 0.117418900 |
| O | 0.390538000 | 0.505000000 | 0.117418900 |
| O | 0.890538000 | 0.505000000 | 0.117418900 |
| O | 0.110538000 | 0.770000000 | 0.117418900 |
| O | 0.610538000 | 0.770000000 | 0.117418900 |
| O | 0.390538000 | 0.230000000 | 0.130584600 |
| O | 0.890538000 | 0.230000000 | 0.130584600 |
| O | 0.610538000 | 0.495000000 | 0.130584600 |
| O | 0.110538000 | 0.495000000 | 0.130584600 |
| O | 0.390538000 | 0.730000000 | 0.130584600 |
| O | 0.890538000 | 0.730000000 | 0.130584600 |
| O | 0.610538000 | 0.995000000 | 0.130584600 |
| O | 0.110538000 | 0.995000000 | 0.130584600 |
| O | 0.250538000 | 0.012500000 | 0.172276100 |
| O | 0.750538000 | 0.012500000 | 0.172276100 |
| O | 0.250538000 | 0.237500000 | 0.172276100 |
| O | 0.750538000 | 0.237500000 | 0.172276100 |
| O | 0.250538000 | 0.512500000 | 0.172276100 |
| O | 0.750538000 | 0.512500000 | 0.172276100 |
| O | 0.250538000 | 0.737500000 | 0.172276100 |
| O | 0.750538000 | 0.737500000 | 0.172276100 |

|   |              |             |             |
|---|--------------|-------------|-------------|
| O | 0.250538000  | 0.737500000 | 0.172276100 |
| O | 0.605538000  | 0.145000000 | 0.175567500 |
| O | 0.105538000  | 0.145000000 | 0.175567500 |
| O | 0.355538000  | 0.355000000 | 0.175567500 |
| O | 0.855538000  | 0.355000000 | 0.175567500 |
| O | 0.105538000  | 0.645000000 | 0.175567500 |
| O | 0.605538000  | 0.645000000 | 0.175567500 |
| O | 0.855538000  | 0.855000000 | 0.175567500 |
| O | 0.355538000  | 0.855000000 | 0.175567500 |
| O | 0.395538000  | 0.105000000 | 0.182150300 |
| O | 0.895538000  | 0.105000000 | 0.182150300 |
| O | 0.645538000  | 0.395000000 | 0.182150300 |
| O | 0.145538000  | 0.395000000 | 0.182150300 |
| O | 0.395538000  | 0.605000000 | 0.182150300 |
| O | 0.895538000  | 0.605000000 | 0.182150300 |
| O | 0.645538000  | 0.895000000 | 0.182150300 |
| O | 0.145538000  | 0.895000000 | 0.182150300 |
| O | 0.500538000  | 0.262500000 | 0.185441800 |
| O | 0.000538000  | 0.262500000 | 0.185441800 |
| O | 0.500538000  | 0.487500000 | 0.185441800 |
| O | 0.000538000  | 0.487500000 | 0.185441800 |
| O | 0.000538000  | 0.762500000 | 0.185441800 |
| O | 0.500538000  | 0.762500000 | 0.185441800 |
| O | 0.500538000  | 0.987500000 | 0.185441800 |
| O | 0.000538000  | 0.987500000 | 0.185441800 |
| O | 0.146327647  | 0.253190987 | 0.237957448 |
| O | 0.646180283  | 0.252355615 | 0.237944125 |
| O | 0.859851524  | 0.482523717 | 0.237649369 |
| O | 0.359633533  | 0.482180574 | 0.237649271 |
| O | 0.646298690  | 0.752875545 | 0.237949108 |
| O | 0.146142960  | 0.752665203 | 0.237956281 |
| O | 0.360002626  | 0.982609879 | 0.237666887 |
| O | 0.859952137  | 0.982424309 | 0.237670984 |
| O | 0.143982194  | 0.027251879 | 0.238945223 |
| O | 0.643722075  | 0.027307895 | 0.238988401 |
| O | 0.357063675  | 0.240843820 | 0.239549943 |
| O | 0.856777971  | 0.241252918 | 0.239461383 |
| O | 0.143702856  | 0.527069103 | 0.239008258 |
| O | 0.643661910  | 0.527664758 | 0.238931926 |
| O | 0.356731047  | 0.741203366 | 0.239449674 |
| O | 0.857193020  | 0.740904506 | 0.239538602 |
| O | 0.499826635  | 0.025925857 | 0.287530240 |
| O | -0.000212598 | 0.025904591 | 0.287248573 |
| O | 0.503948369  | 0.226122571 | 0.285583740 |
| O | 0.003966358  | 0.226384649 | 0.285448003 |
| O | 0.499583670  | 0.525726982 | 0.287250411 |
| O | -0.000313294 | 0.525800620 | 0.287510131 |
| O | 0.004004941  | 0.726181881 | 0.285623383 |
| O | 0.503954411  | 0.726378750 | 0.285440897 |
| O | 0.352765669  | 0.118393327 | 0.295291065 |
| O | 0.852793486  | 0.118617685 | 0.295002921 |
| O | 0.104276146  | 0.383302572 | 0.286814823 |
| O | 0.604247372  | 0.383095509 | 0.286337067 |
| O | 0.852706806  | 0.618550312 | 0.295190107 |
| O | 0.352690782  | 0.618577874 | 0.294916665 |
| O | 0.104283452  | 0.883117634 | 0.286602440 |
| O | 0.604394189  | 0.883318407 | 0.286613676 |
| O | 0.150661073  | 0.131814159 | 0.300506927 |
| O | 0.650939414  | 0.131822274 | 0.300603855 |



|   |             |             |             |
|---|-------------|-------------|-------------|
| O | 0.403101321 | 0.369073354 | 0.295755821 |
| O | 0.903205205 | 0.369246536 | 0.295669546 |
| O | 0.650367660 | 0.631797885 | 0.300659932 |
| O | 0.150900038 | 0.631853709 | 0.300484595 |
| O | 0.903263429 | 0.869097518 | 0.295744333 |
| O | 0.403475311 | 0.869054713 | 0.295589882 |
| O | 0.255739862 | 0.274370766 | 0.302179971 |
| O | 0.755695492 | 0.274686859 | 0.302244953 |
| O | 0.750191773 | 0.476713461 | 0.300546831 |
| O | 0.250367455 | 0.476783837 | 0.300823042 |
| O | 0.755726984 | 0.774405949 | 0.302112784 |
| O | 0.255718152 | 0.774713788 | 0.302279831 |
| O | 0.250421254 | 0.976564772 | 0.300548625 |
| O | 0.750504601 | 0.976766670 | 0.300726824 |
| O | 0.888841964 | 0.999235729 | 0.356031759 |
| O | 0.387316237 | 0.997271276 | 0.356340173 |
| O | 0.111321589 | 0.268780365 | 0.349437387 |
| O | 0.610103829 | 0.267909178 | 0.349373401 |
| O | 0.886980174 | 0.497699540 | 0.356353155 |
| O | 0.388801059 | 0.499365359 | 0.356203963 |
| O | 0.611655547 | 0.769018276 | 0.349411869 |
| O | 0.110112315 | 0.767469202 | 0.349505712 |
| O | 0.407859215 | 0.240409467 | 0.348525319 |
| O | 0.907953727 | 0.240217874 | 0.348310148 |
| O | 0.605177192 | 0.487577841 | 0.346657336 |
| O | 0.105434132 | 0.489230751 | 0.347078772 |
| O | 0.907818382 | 0.739965521 | 0.348564590 |
| O | 0.407863073 | 0.739922794 | 0.348289444 |
| O | 0.105216324 | 0.987993069 | 0.346698116 |
| O | 0.605531724 | 0.988530915 | 0.346972365 |
| O | 0.245877372 | 0.021425932 | 0.409505949 |
| O | 0.746831892 | 0.021841490 | 0.408835004 |
| O | 0.756516700 | 0.231962512 | 0.395568493 |
| O | 0.257280185 | 0.232945902 | 0.397294786 |
| O | 0.246873341 | 0.521665681 | 0.409025930 |
| O | 0.745657549 | 0.521487732 | 0.409835732 |
| O | 0.256533225 | 0.731858343 | 0.395663698 |
| O | 0.757435055 | 0.732805829 | 0.397539342 |
| O | 0.104785474 | 0.128452116 | 0.395909792 |
| O | 0.604453492 | 0.127758800 | 0.397286585 |
| O | 0.857550707 | 0.368187571 | 0.408205746 |
| O | 0.360084392 | 0.369100607 | 0.407234234 |
| O | 0.104551512 | 0.627817528 | 0.397781036 |
| O | 0.604861445 | 0.628446042 | 0.395731155 |
| O | 0.357510603 | 0.868078912 | 0.408528636 |
| O | 0.860185565 | 0.869037786 | 0.407136292 |
| O | 0.396983311 | 0.126556241 | 0.410929391 |
| O | 0.896680156 | 0.127868087 | 0.411828801 |
| O | 0.649227868 | 0.382564149 | 0.407629674 |
| O | 0.150773746 | 0.382935912 | 0.408329289 |
| O | 0.896909836 | 0.626649849 | 0.411138860 |
| O | 0.396838179 | 0.627990874 | 0.411989145 |
| O | 0.651274648 | 0.882942895 | 0.408363537 |
| O | 0.149214629 | 0.882748655 | 0.407500871 |
| O | 0.503420627 | 0.271964068 | 0.416901441 |
| O | 0.003305380 | 0.273430899 | 0.415725559 |
| O | 0.008397858 | 0.482202438 | 0.417771986 |
| O | 0.509474880 | 0.484696052 | 0.418549182 |
| O | 0.003616366 | 0.771909404 | 0.417038426 |

|   |             |             |             |
|---|-------------|-------------|-------------|
| O | 0.503414580 | 0.773580690 | 0.415468769 |
| O | 0.508579763 | 0.982253736 | 0.417847597 |
| O | 0.009273393 | 0.984638140 | 0.418507562 |
| O | 0.152636397 | 0.233077626 | 0.455480919 |
| O | 0.657660386 | 0.235835373 | 0.455386854 |
| O | 0.372388097 | 0.494904071 | 0.463384816 |
| O | 0.873079336 | 0.496220204 | 0.463531170 |
| O | 0.158037806 | 0.737005679 | 0.455590459 |
| O | 0.651647865 | 0.732885785 | 0.455466949 |
| O | 0.372908425 | 0.997093098 | 0.463481739 |
| O | 0.871939538 | 0.994881241 | 0.463208221 |
| W | 0.124538000 | 0.263000000 | 0.061464600 |
| W | 0.624538000 | 0.263000000 | 0.061464600 |
| W | 0.624538000 | 0.763000000 | 0.061464600 |
| W | 0.124538000 | 0.763000000 | 0.061464600 |
| W | 0.377038000 | 0.483500000 | 0.062342300 |
| W | 0.877038000 | 0.483500000 | 0.062342300 |
| W | 0.877038000 | 0.983500000 | 0.062342300 |
| W | 0.377038000 | 0.983500000 | 0.062342300 |
| W | 0.374038000 | 0.233500000 | 0.075946900 |
| W | 0.874038000 | 0.233500000 | 0.075946900 |
| W | 0.874038000 | 0.733500000 | 0.075946900 |
| W | 0.374038000 | 0.733500000 | 0.075946900 |
| W | 0.626538000 | 0.013000000 | 0.076824600 |
| W | 0.126538000 | 0.013000000 | 0.076824600 |
| W | 0.126538000 | 0.513000000 | 0.076824600 |
| W | 0.626538000 | 0.513000000 | 0.076824600 |
| W | 0.874538000 | 0.487000000 | 0.171178900 |
| W | 0.374538000 | 0.487000000 | 0.171178900 |
| W | 0.374538000 | 0.987000000 | 0.171178900 |
| W | 0.874538000 | 0.987000000 | 0.171178900 |
| W | 0.627038000 | 0.266500000 | 0.172056600 |
| W | 0.127038000 | 0.266500000 | 0.172056600 |
| W | 0.127038000 | 0.766500000 | 0.172056600 |
| W | 0.627038000 | 0.766500000 | 0.172056600 |
| W | 0.624038000 | 0.016500000 | 0.185661200 |
| W | 0.124038000 | 0.016500000 | 0.185661200 |
| W | 0.124038000 | 0.516500000 | 0.185661200 |
| W | 0.624038000 | 0.516500000 | 0.185661200 |
| W | 0.376538000 | 0.237000000 | 0.186538900 |
| W | 0.876538000 | 0.237000000 | 0.186538900 |
| W | 0.876538000 | 0.737000000 | 0.186538900 |
| W | 0.376538000 | 0.737000000 | 0.186538900 |
| W | 0.128969591 | 0.264900573 | 0.288202142 |
| W | 0.628973909 | 0.264909405 | 0.288177415 |
| W | 0.129004106 | 0.764816170 | 0.288213169 |
| W | 0.628936560 | 0.764968974 | 0.288180365 |
| W | 0.875814259 | 0.485698369 | 0.287941192 |
| W | 0.375851127 | 0.485509313 | 0.287945558 |
| W | 0.876075212 | 0.985640666 | 0.287980308 |
| W | 0.376038694 | 0.985560441 | 0.287968427 |
| W | 0.877012071 | 0.236444329 | 0.292452336 |
| W | 0.377084083 | 0.236212745 | 0.292573620 |
| W | 0.877142772 | 0.736418618 | 0.292552233 |
| W | 0.376992180 | 0.736372092 | 0.292445759 |
| W | 0.128220949 | 0.015585898 | 0.291778433 |
| W | 0.628319262 | 0.015701992 | 0.291800924 |
| W | 0.628018402 | 0.515653179 | 0.291743503 |
| W | 0.128145048 | 0.515635650 | 0.291808607 |

|   |             |             |             |
|---|-------------|-------------|-------------|
| W | 0.871898227 | 0.492818972 | 0.407749156 |
| W | 0.372650373 | 0.493513275 | 0.407557867 |
| W | 0.872699261 | 0.993641451 | 0.407423098 |
| W | 0.372052139 | 0.992537580 | 0.407742269 |
| W | 0.130926252 | 0.263166330 | 0.401469605 |
| W | 0.630845256 | 0.262763733 | 0.401373375 |
| W | 0.130989901 | 0.762776650 | 0.401505536 |
| W | 0.631226945 | 0.763310909 | 0.401433747 |
| W | 0.119493226 | 0.009299508 | 0.396359210 |
| W | 0.619572125 | 0.008627512 | 0.396662452 |
| W | 0.119517657 | 0.508681392 | 0.396799543 |
| W | 0.619513825 | 0.509285910 | 0.396301107 |
| W | 0.884888300 | 0.243846555 | 0.397804193 |
| W | 0.385763853 | 0.243336576 | 0.398103462 |
| W | 0.385026552 | 0.743725348 | 0.397810039 |
| W | 0.885979111 | 0.743441391 | 0.398149029 |
| H | 0.100685082 | 0.233794707 | 0.472547509 |
| H | 0.110223944 | 0.748007557 | 0.474041349 |
| H | 0.428639885 | 0.001211883 | 0.478847582 |
| H | 0.428713717 | 0.491796244 | 0.478424184 |
| H | 0.609969788 | 0.247217056 | 0.473865465 |
| H | 0.599228498 | 0.731150913 | 0.472229812 |
| H | 0.928072646 | 0.991680767 | 0.478409416 |
| H | 0.929205095 | 0.498291886 | 0.478718270 |

### (3) DIPAS

#### lattice constant

|                     |                     |                     |
|---------------------|---------------------|---------------------|
| 20.0000000000000000 | 0.0000000000000000  | 0.0000000000000000  |
| 0.0000000000000000  | 20.0000000000000000 | 0.0000000000000000  |
| 0.0000000000000000  | 0.0000000000000000  | 20.0000000000000000 |

#### fractional coordinates

|    |             |             |             |
|----|-------------|-------------|-------------|
| H  | 0.476434550 | 0.430445950 | 0.408550150 |
| H  | 0.564075000 | 0.510727600 | 0.388705450 |
| H  | 0.446632200 | 0.545388500 | 0.390263850 |
| H  | 0.606837350 | 0.609499550 | 0.541214050 |
| H  | 0.401735150 | 0.446890650 | 0.551100950 |
| H  | 0.568563650 | 0.583617550 | 0.617411700 |
| H  | 0.369437750 | 0.501309300 | 0.488404700 |
| H  | 0.649853600 | 0.554704600 | 0.596969850 |
| H  | 0.348863550 | 0.515202800 | 0.573539600 |
| H  | 0.467366200 | 0.540406650 | 0.599882100 |
| H  | 0.606219350 | 0.493213850 | 0.499022800 |
| H  | 0.415504450 | 0.625234800 | 0.482954100 |
| H  | 0.531746250 | 0.455067600 | 0.628073150 |
| H  | 0.392318900 | 0.634515350 | 0.568404500 |
| H  | 0.615177800 | 0.433322950 | 0.607255950 |
| H  | 0.547534150 | 0.401519650 | 0.558652650 |
| H  | 0.476270550 | 0.650559950 | 0.542762650 |
| C  | 0.600623400 | 0.567200500 | 0.575768150 |
| C  | 0.389309550 | 0.499228400 | 0.539780550 |
| C  | 0.570898500 | 0.506514150 | 0.539384100 |
| C  | 0.450745700 | 0.544536150 | 0.547438550 |
| C  | 0.565919500 | 0.445574950 | 0.585941150 |
| C  | 0.432697450 | 0.618060300 | 0.534750450 |
| N  | 0.507341000 | 0.522375300 | 0.505487100 |
| Si | 0.497894400 | 0.501262850 | 0.422128200 |

#### (4) BDEAS

##### lattice constant

|                     |                     |                     |
|---------------------|---------------------|---------------------|
| 20.0000000000000000 | 0.0000000000000000  | 0.0000000000000000  |
| 0.0000000000000000  | 20.0000000000000000 | 0.0000000000000000  |
| 0.0000000000000000  | 0.0000000000000000  | 20.0000000000000000 |

##### fractional coordinates

|    |             |             |             |
|----|-------------|-------------|-------------|
| C  | 0.399774976 | 0.520516595 | 0.530685742 |
| C  | 0.438419280 | 0.585165573 | 0.544477678 |
| C  | 0.431135928 | 0.495959155 | 0.411879365 |
| C  | 0.363766779 | 0.518324922 | 0.383959466 |
| C  | 0.621130241 | 0.432879672 | 0.566325801 |
| C  | 0.662419248 | 0.377501204 | 0.533092869 |
| C  | 0.596814090 | 0.501509691 | 0.465399203 |
| C  | 0.650405108 | 0.553425426 | 0.481600244 |
| H  | 0.475906956 | 0.395270478 | 0.577212273 |
| H  | 0.499719249 | 0.369103230 | 0.458818821 |
| H  | 0.393742605 | 0.492499671 | 0.577838186 |
| H  | 0.348599266 | 0.532268685 | 0.513795562 |
| H  | 0.446817433 | 0.613854980 | 0.498243833 |
| H  | 0.487515841 | 0.573726586 | 0.566454365 |
| H  | 0.410602287 | 0.617393910 | 0.579373395 |
| H  | 0.449647082 | 0.452950317 | 0.382627181 |
| H  | 0.467106323 | 0.537180392 | 0.402527880 |
| H  | 0.325420686 | 0.479133383 | 0.388094167 |
| H  | 0.370030074 | 0.531136993 | 0.330813936 |
| H  | 0.345286098 | 0.563526307 | 0.409244161 |
| H  | 0.594847394 | 0.412442148 | 0.610317445 |
| H  | 0.654918613 | 0.471923018 | 0.585874467 |
| H  | 0.687156067 | 0.395684119 | 0.487400507 |
| H  | 0.630579171 | 0.334932361 | 0.518933850 |
| H  | 0.701639352 | 0.359095180 | 0.567027711 |
| H  | 0.554120093 | 0.527955597 | 0.443033965 |
| H  | 0.616202839 | 0.467688243 | 0.425798301 |
| H  | 0.662925662 | 0.581218191 | 0.435784567 |
| H  | 0.696909275 | 0.530565073 | 0.499964909 |
| H  | 0.632750136 | 0.589409006 | 0.519288241 |
| N  | 0.570879437 | 0.464099078 | 0.523127295 |
| N  | 0.431110067 | 0.475167934 | 0.482295147 |
| Si | 0.494515393 | 0.423389034 | 0.510531016 |

#### (5) TDMAS

##### lattice constant

|                     |                     |                     |
|---------------------|---------------------|---------------------|
| 20.0000000000000000 | 0.0000000000000000  | 0.0000000000000000  |
| 0.0000000000000000  | 20.0000000000000000 | 0.0000000000000000  |
| 0.0000000000000000  | 0.0000000000000000  | 20.0000000000000000 |

##### fractional coordinates

|   |             |             |             |
|---|-------------|-------------|-------------|
| H | 0.488307451 | 0.505049546 | 0.444006210 |
| H | 0.616204012 | 0.417419904 | 0.521892985 |
| H | 0.569449651 | 0.590643231 | 0.429958884 |
| H | 0.386598927 | 0.558466438 | 0.462689588 |
| H | 0.594870071 | 0.365306110 | 0.591277303 |
| H | 0.567752567 | 0.343444942 | 0.509230389 |
| H | 0.593107223 | 0.646048206 | 0.495911256 |
| H | 0.377097404 | 0.623084403 | 0.523563618 |
| H | 0.652971493 | 0.589751927 | 0.461166876 |

|    |             |             |             |
|----|-------------|-------------|-------------|
| H  | 0.331279786 | 0.546981182 | 0.531734481 |
| H  | 0.473860277 | 0.364445559 | 0.629200712 |
| H  | 0.614733966 | 0.594398549 | 0.610890736 |
| H  | 0.430969386 | 0.604741695 | 0.637675859 |
| H  | 0.449401532 | 0.342496096 | 0.546333652 |
| H  | 0.673831604 | 0.538769674 | 0.573990080 |
| H  | 0.383466845 | 0.529806652 | 0.646750943 |
| H  | 0.472354505 | 0.526872495 | 0.651743676 |
| H  | 0.604082939 | 0.506023440 | 0.618942145 |
| H  | 0.415935635 | 0.415895684 | 0.584661101 |
| C  | 0.576488608 | 0.386203489 | 0.543413825 |
| C  | 0.599798087 | 0.594851119 | 0.475634919 |
| C  | 0.380123337 | 0.568195892 | 0.516402250 |
| C  | 0.461232939 | 0.385316454 | 0.579501766 |
| C  | 0.430231330 | 0.550663196 | 0.625554106 |
| C  | 0.619945854 | 0.545861926 | 0.584543530 |
| N  | 0.516002889 | 0.425317414 | 0.553405557 |
| N  | 0.434678400 | 0.538882677 | 0.554089004 |
| N  | 0.580942896 | 0.543474377 | 0.523351592 |
| Si | 0.504412472 | 0.503151146 | 0.517166527 |
